# Supplementary material for: Profiles of immune cell infiltration and immune-related genes in the tumor microenvironment of osteosarcoma cancer
Source: BMC Cancer. 2021 Dec 18;21:1345. doi: 10.1186/s12885-021-09042-6 (PMC8684084; doi:10.1186/s12885-021-09042-6)
Supplement: Supplementary file 1 — Additional file 1. [file 12885_2021_9042_MOESM1_ESM.xlsx]

## Sheet: clinc_OS
Sample_ID	Patient_ID	Sex	Race	Age	Disease_Free_Status	Disease_Free_Months	Overall_Survival_Status	Overall_Survival_Months	Sample_Type
TARGET-40-0A4HLD-01A	TARGET-40-0A4HLD	Male	NA	20	DiseaseFree	129.377	LIVING	129.377	Non-metastatic (confirmed)
TARGET-40-0A4HMC-01A	TARGET-40-0A4HMC	Male	White	28	DiseaseFree	12.3607	LIVING	12.3607	Non-metastatic (confirmed)
TARGET-40-0A4HX8-01A	TARGET-40-0A4HX8	Male	White	29	DiseaseFree	100	LIVING	57.377	Non-metastatic (confirmed)
TARGET-40-0A4HXS-01A	TARGET-40-0A4HXS	Male	White	23	DiseaseFree	96.6557	LIVING	96.6557	Non-metastatic (confirmed)
TARGET-40-0A4HY5-01A	TARGET-40-0A4HY5	Male	NA	20	Recurred/Progressed	7.14754	DECEASED	9.5082	Metastatic
TARGET-40-0A4I0Q-01A	TARGET-40-0A4I0Q	Female	NA	20	DiseaseFree	17.0164	DECEASED	17.0164	Metastatic
TARGET-40-0A4I0S-01A	TARGET-40-0A4I0S	Male	NA	25	DiseaseFree	19.7705	LIVING	19.7705	Non-metastatic (confirmed)
TARGET-40-0A4I0W-01A	TARGET-40-0A4I0W	Male	Asian	20	DiseaseFree	22.3934	LIVING	22.3934	Non-metastatic (confirmed)
TARGET-40-0A4I3S-01A	TARGET-40-0A4I3S	Male	Black	23	DiseaseFree	60.459	LIVING	60.459	Non-metastatic (confirmed)
TARGET-40-0A4I42-01A	TARGET-40-0A4I42	Female	NA	17	Recurred/Progressed	11.5082	DECEASED	20.2951	Non-metastatic (confirmed)
TARGET-40-0A4I48-01A	TARGET-40-0A4I48	Female	NA	16	DiseaseFree	52.9836	LIVING	52.9836	Metastatic
TARGET-40-0A4I4E-01A	TARGET-40-0A4I4E	Male	NA	16	NA	NA	NA	NA	Metastatic
TARGET-40-0A4I4M-01A	TARGET-40-0A4I4M	Female	Asian	19	DiseaseFree	23.2131	LIVING	23.2131	Non-metastatic (confirmed)
TARGET-40-0A4I4O-01A	TARGET-40-0A4I4O	Male	White	32	Recurred/Progressed	7.70492	DECEASED	20.5574	Non-metastatic (confirmed)
TARGET-40-0A4I5B-01A	TARGET-40-0A4I5B	Male	NA	21	DiseaseFree	20.2951	LIVING	20.2951	Non-metastatic (confirmed)
TARGET-40-0A4I65-01A	TARGET-40-0A4I65	Male	NA	18	Recurred/Progressed	65.3443	LIVING	191.475	Non-metastatic (Confirmed)
TARGET-40-0A4I6O-01A	TARGET-40-0A4I6O	Male	NA	18	Recurred/Progressed	15.8689	DECEASED	62.4918	Non-metastatic (confirmed)
TARGET-40-0A4I8U-01A	TARGET-40-0A4I8U	Male	NA	20	DiseaseFree	32.2295	LIVING	32.2295	Non-metastatic (confirmed)
TARGET-40-0A4I9K-01A	TARGET-40-0A4I9K	Male	NA	23	NA	74	LIVING	74	Non-metastatic (Confirmed)
TARGET-40-PAKFVX-01A	TARGET-40-PAKFVX	Male	Unknown	15	Recurred/Progressed	11.8361	LIVING	30.2295	Non-metastatic (confirmed)
TARGET-40-PAKUZU-01A	TARGET-40-PAKUZU	Male	Asian	20	DiseaseFree	0	LIVING	0	Non-metastatic (confirmed)
TARGET-40-PAKXLD-01A	TARGET-40-PAKXLD	Female	White	14	Recurred/Progressed	18.9508	LIVING	80.7213	Non-metastatic (confirmed)
TARGET-40-PAKZZK-01A	TARGET-40-PAKZZK	Male	White	13	Recurred/Progressed	14.8197	DECEASED	49.6721	Non-metastatic (confirmed)
TARGET-40-PALECC-01A	TARGET-40-PALECC	Female	Unknown	10	Recurred/Progressed	12.5902	DECEASED	24.7213	Non-metastatic (confirmed)
TARGET-40-PALFYN-01A	TARGET-40-PALFYN	Female	White	13	Recurred/Progressed	21.3443	DECEASED	32.8852	Non-metastatic (confirmed)
TARGET-40-PALHRL-01A	TARGET-40-PALHRL	Male	Black	16	DiseaseFree	143.41	LIVING	143.41	Metastatic
TARGET-40-PALKDP-01A	TARGET-40-PALKDP	Female	White	9	DiseaseFree	107.607	LIVING	107.607	Non-metastatic (confirmed)
TARGET-40-PALKGN-01A	TARGET-40-PALKGN	Male	White	17	DiseaseFree	69.5738	LIVING	69.5738	Non-metastatic (confirmed)
TARGET-40-PALWWX-01A	TARGET-40-PALWWX	Female	White	12	DiseaseFree	70.918	LIVING	70.918	Metastatic
TARGET-40-PALZGU-01A	TARGET-40-PALZGU	Male	White	15	Recurred/Progressed	47.6066	DECEASED	94.4918	Non-metastatic (confirmed)
TARGET-40-PAMEKS-01A	TARGET-40-PAMEKS	Male	Asian	11	Recurred/Progressed	12.623	DECEASED	28.0984	Metastatic
TARGET-40-PAMHLF-01A	TARGET-40-PAMHLF	Male	White	9	DiseaseFree	62.7213	LIVING	62.7213	Non-metastatic (confirmed)
TARGET-40-PAMHYN-01A	TARGET-40-PAMHYN	Female	Asian	10	DiseaseFree	127.869	LIVING	127.869	Non-metastatic (confirmed)
TARGET-40-PAMJXS-01A	TARGET-40-PAMJXS	Male	Black	11	Recurred/Progressed	104.393	DECEASED	126.623	Non-metastatic (confirmed)
TARGET-40-PAMLKS-01A	TARGET-40-PAMLKS	Female	White	12	Recurred/Progressed	2.32787	DECEASED	5.90164	Metastatic
TARGET-40-PAMRHD-01A	TARGET-40-PAMRHD	Female	Unknown	11	Recurred/Progressed	1.27869	DECEASED	2.42623	Metastatic
TARGET-40-PAMTCM-01A	TARGET-40-PAMTCM	Female	Black	14	DiseaseFree	98.4262	LIVING	98.4262	Non-metastatic (confirmed)
TARGET-40-PAMYYJ-01A	TARGET-40-PAMYYJ	Male	White	18	Recurred/Progressed	4.19672	DECEASED	8.88525	Metastatic
TARGET-40-PANGPE-01A	TARGET-40-PANGPE	Male	White	13	DiseaseFree	27.3115	LIVING	110.754	Non-metastatic (confirmed)
TARGET-40-PANGRW-01A	TARGET-40-PANGRW	Male	White	17	DiseaseFree	110.754	LIVING	110.754	Non-metastatic (confirmed)
TARGET-40-PANMIG-01A	TARGET-40-PANMIG	Male	White	15	Recurred/Progressed	16.8197	DECEASED	25.4426	Metastatic
TARGET-40-PANPUM-01A	TARGET-40-PANPUM	Male	White	16	Recurred/Progressed	1.5082	DECEASED	9.67213	Metastatic
TARGET-40-PANSEN-01A	TARGET-40-PANSEN	Male	White	14	DiseaseFree	73.9672	LIVING	73.9672	Non-metastatic (confirmed)
TARGET-40-PANVJJ-01A	TARGET-40-PANVJJ	Female	White	14	DiseaseFree	101.475	LIVING	101.475	Non-metastatic (confirmed)
TARGET-40-PANXSC-01A	TARGET-40-PANXSC	Male	White	15	Recurred/Progressed	12	LIVING	39.9016	Non-metastatic (confirmed)
TARGET-40-PANZHX-01A	TARGET-40-PANZHX	Female	Asian	14	Recurred/Progressed	26.623	LIVING	43.377	Metastatic
TARGET-40-PANZZJ-01A	TARGET-40-PANZZJ	Male	White	19	DiseaseFree	50.4262	LIVING	50.4262	Non-metastatic (confirmed)
TARGET-40-PAPFLB-01A	TARGET-40-PAPFLB	Male	White	15	NA	NA	NA	NA	Non-metastatic (confirmed)
TARGET-40-PAPIJR-01A	TARGET-40-PAPIJR	Female	White	13	DiseaseFree	56.3607	LIVING	56.3607	Non-metastatic (confirmed)
TARGET-40-PAPKWD-01A	TARGET-40-PAPKWD	Male	White	10	Recurred/Progressed	6.29508	DECEASED	13.8361	Non-metastatic (confirmed)
TARGET-40-PAPNVD-01A	TARGET-40-PAPNVD	Female	White	14	Recurred/Progressed	19.4754	DECEASED	30.2295	Non-metastatic (confirmed)
TARGET-40-PAPWWC-01A	TARGET-40-PAPWWC	Female	White	10	Recurred/Progressed	63.377	LIVING	82.623	Non-metastatic (confirmed)
TARGET-40-PAPXGT-01A	TARGET-40-PAPXGT	Female	Black	11	DiseaseFree	82.8197	LIVING	82.8197	Non-metastatic (confirmed)
TARGET-40-PARBGW-01A	TARGET-40-PARBGW	Female	Unknown	13	DiseaseFree	9.37705	LIVING	9.37705	Metastatic (confirmed)
TARGET-40-PARDAX-01A	TARGET-40-PARDAX	Male	White	10	Recurred/Progressed	3.44262	DECEASED	22.2623	Metastatic (confirmed)
TARGET-40-PARFTG-01A	TARGET-40-PARFTG	Female	Asian	14	Recurred/Progressed	1.7377	DECEASED	21.4098	Non-metastatic (confirmed)
TARGET-40-PARGTM-01A	TARGET-40-PARGTM	Male	White	16	DiseaseFree	85.5738	LIVING	85.5738	Non-metastatic (confirmed)
TARGET-40-PARJXU-01A	TARGET-40-PARJXU	Female	White	13	Recurred/Progressed	26.5902	DECEASED	53.4754	Metastatic (confirmed)
TARGET-40-PARKAF-01A	TARGET-40-PARKAF	Male	White	17	Recurred/Progressed	1.83607	DECEASED	34.7869	Non-metastatic (confirmed)
TARGET-40-PASEBY-01A	TARGET-40-PASEBY	Male	White	12	Recurred/Progressed	1.37705	LIVING	67.1803	Non-metastatic (confirmed)
TARGET-40-PASEFS-01A	TARGET-40-PASEFS	Male	White	18	DiseaseFree	69.2459	LIVING	69.2459	Non-metastatic (confirmed)
TARGET-40-PASFCV-01A	TARGET-40-PASFCV	Female	White	11	DiseaseFree	67.6066	LIVING	67.6066	Non-metastatic (confirmed)
TARGET-40-PASKZZ-01A	TARGET-40-PASKZZ	Female	White	13	DiseaseFree	17.7705	LIVING	17.7705	Non-metastatic (confirmed)
TARGET-40-PASNZV-01A	TARGET-40-PASNZV	Male	White	16	DiseaseFree	57.2787	LIVING	57.2787	Non-metastatic (confirmed)
TARGET-40-PASRNE-01A	TARGET-40-PASRNE	Female	White	4	Recurred/Progressed	16.7869	LIVING	55.9672	Non-metastatic (confirmed)
TARGET-40-PASSLM-01A	TARGET-40-PASSLM	Male	White	10	Recurred/Progressed	61.1475	LIVING	61.1475	Metastatic (confirmed)
TARGET-40-PASUUH-01A	TARGET-40-PASUUH	Female	White	14	DiseaseFree	53.2787	LIVING	53.2787	Non-metastatic (confirmed)
TARGET-40-PASYUK-01A	TARGET-40-PASYUK	Female	Unknown	16	DiseaseFree	61.3115	LIVING	61.3115	Non-metastatic (confirmed)
TARGET-40-PATAWV-01A	TARGET-40-PATAWV	Male	White	16	DiseaseFree	55.8033	LIVING	55.8033	Non-metastatic (confirmed)
TARGET-40-PATEEM-01A	TARGET-40-PATEEM	Male	White	16	Recurred/Progressed	31.5082	LIVING	47.5738	Non-metastatic (confirmed)
TARGET-40-PATJVI-01A	TARGET-40-PATJVI	Male	White	16	DiseaseFree	51.6393	LIVING	51.6393	Metastatic (confirmed)
TARGET-40-PATKSS-01A	TARGET-40-PATKSS	Male	White	13	Recurred/Progressed	2.06557	DECEASED	24.8525	Non-metastatic (confirmed)
TARGET-40-PATMIF-01A	TARGET-40-PATMIF	Female	White	12	DiseaseFree	51.8033	LIVING	51.8033	Non-metastatic (confirmed)
TARGET-40-PATMPU-01A	TARGET-40-PATMPU	Male	Unknown	14	Recurred/Progressed	16.3279	DECEASED	51.7705	Non-metastatic (confirmed)
TARGET-40-PATMXR-01A	TARGET-40-PATMXR	Female	Unknown	21	Recurred/Progressed	2.22951	DECEASED	12.6557	Metastatic
TARGET-40-PATPBS-01A	TARGET-40-PATPBS	Male	White	15	DiseaseFree	48.1311	LIVING	48.1311	Non-metastatic (confirmed)
TARGET-40-PATUXZ-01A	TARGET-40-PATUXZ	Female	Unknown	17	DiseaseFree	16.7213	DECEASED	16.7213	Metastatic (confirmed)
TARGET-40-PAUBIT-01A	TARGET-40-PAUBIT	Female	White	12	DiseaseFree	33.7377	LIVING	33.7377	Non-metastatic (confirmed)
TARGET-40-PAUTWB-01A	TARGET-40-PAUTWB	Male	White	14	Recurred/Progressed	19.6066	LIVING	22.5246	Non-metastatic (confirmed)
TARGET-40-PAUTYB-01A	TARGET-40-PAUTYB	Female	White	12	Recurred/Progressed	17.2787	DECEASED	17.6066	Non-metastatic (confirmed)
TARGET-40-PAUUML-01A	TARGET-40-PAUUML	Male	Unknown	6	DiseaseFree	22.0328	LIVING	22.0328	Non-metastatic (confirmed)
TARGET-40-PAUVUL-01A	TARGET-40-PAUVUL	Female	Black	6	Recurred/Progressed	7.77049	DECEASED	11.377	Metastatic (confirmed)
TARGET-40-PAUXPZ-01A	TARGET-40-PAUXPZ	Female	Unknown	12	Recurred/Progressed	13.7377	DECEASED	19.8689	Metastatic (confirmed)
TARGET-40-PAUYTT-01A	TARGET-40-PAUYTT	Female	White	18	DiseaseFree	18.9836	LIVING	18.9836	Non-metastatic (confirmed)
TARGET-40-PAVALD-01A	TARGET-40-PAVALD	Male	White	16	DiseaseFree	18.0656	LIVING	18.0656	Non-metastatic (confirmed)
TARGET-40-PAVCLP-01A	TARGET-40-PAVCLP	Female	Black	11	DiseaseFree	16.7541	LIVING	16.7541	Non-metastatic (confirmed)
TARGET-40-PAVDTY-01A	TARGET-40-PAVDTY	Male	White	13	DiseaseFree	12.0984	LIVING	12.0984	Non-metastatic (confirmed)
TARGET-40-PAVECB-01A	TARGET-40-PAVECB	Female	White	9	DiseaseFree	15.6066	LIVING	15.6066	Non-metastatic (confirmed)
