# Supplementary material for: Profiles of immune cell infiltration and immune-related genes in the tumor microenvironment of osteosarcoma cancer
Source: BMC Cancer. 2021 Dec 18;21:1345. doi: 10.1186/s12885-021-09042-6 (PMC8684084; doi:10.1186/s12885-021-09042-6)
Supplement: Supplementary file 2 — Additional file 2. [file 12885_2021_9042_MOESM2_ESM.xlsx]

## Sheet: Supplemental Table2
Sample	B cells naive	B cells memory	Plasma cells	T cells CD8	T cells CD4 naive	T cells CD4 memory resting	T cells CD4 memory activated	T cells follicular helper	T cells regulatory Tregs	T cells gamma delta	NK cells resting	NK cells activated	Monocytes	Macrophages M0	Macrophages M1	Macrophages M2	Dendritic cells resting	Dendritic cells activated	Mast cells resting	Mast cells activated	Eosinophils	Neutrophils	P value	Correlation	RMSE
P14Normal	0.0278219	0	0	0	0	0.404179	0.0631127	0	0	0	0.315903	0	0.0959034	0.0309719	0.0140667	0.00444996	0	0	0.0435917	0	0	0	0.47	0.0358894	1.12004
P14Tumor	0.26733	0	0	0	0	0.138424	0	0.114953	0	0	0.0614298	0.00479079	0.196515	0.0469185	0.0397506	0	0	0	0	0.116498	0.0133898	0	0.54	0.0260266	1.08905
P16Normal	0.079972	0	0	0	0	0.417189	0.0165519	0	0	0	0.33541	0	0.10432	0.0131667	0	0.0253861	0.000606885	0	0.00739821	0	0	0	0.49	0.0322161	1.12928
P16Tumor	0.219388	0	0	0	0	0.279863	0	0.0712413	0.00549299	0	0.10797	0	0.104842	0.0751769	0.0351828	0	0	0	0	0.100844	0	0	0.68	0.00601148	1.10686
P20Normal	0.0541499	0	0	0	0	0.383805	0.0291757	0	0	0	0.358528	0	0.104508	0.0155056	0	0	0.0110353	0	0.0432936	0	0	0	0.65	0.0112123	1.13294
P20Tumor	0.151853	0	0	0	0	0.211444	0	0.0547742	0.0082656	0	0.139389	0	0.0152436	0.036619	0	0	0	0.0105043	0	0.371212	0	0.000694916	0.76	-0.0127959	1.13378
P21Normal	0.0712584	0	0	0	0	0.384287	0.0563881	0	0	0	0.328955	0	0.0925942	0.0056536	0	0.00510506	0.0263141	0	0.0294443	0	0	0	0.59	0.0174014	1.1253
P21Tumor	0.0376267	0	0.0228611	0.0358091	0	0.139319	0.0779362	0.082752	0	0	0.0807298	0	0.155552	0.018505	0	0	0.051351	0.0116845	0.190937	0	0.0949361	0	0.41	0.045968	1.07041
H2Normal	0.014123	0	0.0277968	0	0	0.209433	0.00803308	0	0	0	0.36038	0	0.15513	0.0281214	0	0	0	0.084474	0	0.112509	0	0	0.22	0.0984928	1.06483
H2Tumor	0.0703281	0	0.131802	0.115863	0	0.0198688	0.288672	0	0.00769626	0	0.208127	0	0.067504	0	0.00316582	0	0	0	0	0.0219833	0.0649893	0	0.09	0.17677	1.00661
H9Normal	0.130137	0	0	0.13503	0	0.178284	0.0975478	0.0209412	0	0	0.283712	0	0.103625	0.0150736	0.0173238	0	0	0	0	0.0183253	0	0	0.1	0.167402	1.04447
H9Tumor	0.0649052	0	0	0	0	0.204387	0.323199	0.0020442	0	0	0.084637	0	0.0617419	0.0101155	0	0	0	0.0250706	0	0.127941	0.0959589	0	0.07	0.194768	1.00125
P1_N	0.0346442	0	0	0	0	0.481836	0	0	0	0	0.262395	0	0.0671128	0.00305036	0.00467397	0	0.030634	0	0.115653	0	0	0	0.53	0.0293947	1.13711
P1_T	0.0929179	0	0	0.0404942	0	0.208699	0.136857	0	0.0133483	0	0.210147	0	0.0690208	0.0605691	0	0	0	0.0216608	0	0.146286	0	0	0.76	-0.0085867	1.09686
P11_N	0.0585059	0	0	0	0	0.442569	0.0525859	0	0.027286	0	0.298411	0	0.0642353	0.00560441	0	0.0257045	0	0	0.0250982	0	0	0	0.49	0.0320172	1.13262
P11_T	0.109475	0	0	0.0311532	0	0.241039	0.0934803	0	0	0	0.163029	0	0.0740665	0.0848342	0	0	0	0.0130723	0	0.189851	0	0	0.61	0.0157309	1.09093
P2_T	0.145803	0	0	0.130904	0	0.271933	0.0849692	0	0.0350174	0	0.158429	0	0.0871304	0.0397636	0	0	0	0	0.0460498	0	0	0	0.77	-0.0143543	1.13349
P3_N	0.0826538	0	0	0	0	0.468873	0.0413223	0.00927791	0.000239313	0	0.30395	0	0.0568608	0.0010354	0.00602718	0.0097661	0.00811723	0	0.0118769	0	0	0	0.29	0.0760561	1.11959
P3_T	0.0617988	0	0	0.0269521	0	0.168402	0.0266204	0.019284	0	0	0.265177	0	0.0155545	0.163446	0	0	0	0.0233327	0	0.229433	0	0	0.72	-0.0051792	1.11017
P5_N	0.0887508	0	0	0	0	0.486998	0.0236256	0.0070937	0.0170285	0	0.290036	0	0.0577691	0.003825	0.00448425	0.00895231	0.00551746	0	0.00591901	0	0	0	0.33	0.0691459	1.12812
P5_T	0.0398263	0	0.0400563	0.13851	0	0.324887	0.131566	0	0	0	0.10247	0	0.0887191	0.000922307	0	0	0.0223312	0	0.0554694	0	0.055242	0	0.3	0.0726595	1.09075
P9_N	0.0587035	0	0	0	0	0.501801	0	0.0134682	0.015012	0	0.271838	0	0.118369	0.00588944	0.00221717	0	0.00661627	0	0.00608477	0	0	0	0.27	0.0793166	1.12139
P9_T	0.100442	0	0.0883102	0.0360024	0	0.289298	0.129962	0	0	0	0.236673	0	0	0.0697408	0	0	0	0.0121933	0.0194138	0	0.0179644	0	0.89	-0.0301296	1.12129
